# Supplementary material
Source: PubMed Central journal article supplement (PMC3887405)
Supplement: Supp_Data.pdf [file Supp_Data.pdf]

# Supplementary Data

## Supplementary Information

### Gene expression analysis

A further search for relationships to gene sets in curated pathways and sets affected by genetic and chemical perturbations (from the publicly available Molecular Signatures Database) was done with Gene Set Enrichment Analysis (GSEA) [1]. GSEA indicated that genes upregulated in aryl hydrocarbon receptor (AhR)-KO cells were enriched for genes in the following sets: human18S U11/U12 sn RNP [2,3], gene altered in endothelial cells in response to oxidized phospholipids [4], expression signature for cases of acute myelogenous leukemia [5] genes differentially expressed in human thymus compared to other tissues [6]. The changes in enrichment of downregulated genes in AhR-KO mice was also compared with the following published genes sets: differentially expressed genes in human peripheral lymphocytes in response to aging and heat shock [7], genes involved in the regulation of adult germline stem cells [8], genes involved in the Wnt canonical pathway and  $\beta$ -catenin degradation [9].

## Supplementary References

1. Subramanian A, P Tamayo, VK Mootha, S Mukherjee, BL Ebert, MA Gillette, A Paulovich, SL Pomeroy, TR Golub, ES Lander and JP Mesirov. (2005). Gene set enrichment analysis: a knowledge-based approach for interpreting genome-wide expression profiles. *Proc Natl Acad Sci U S A* 102:15545–15550.
2. Will CL, C Schneider, M Hossbach, H Urlaub, R Rauhut, S Elbashir, T Tuschl and R Lührmann. (2004). The human 18S U11/U12 snRNP contains a set of novel protein not found in the U2-dependent spliceosome. *RNA* 10:929–941.
3. Mewes HW, J Hani, F Pfeiffer and D Frishman. (1998). MIPS: a database for protein sequences and complete genomes. *Nucleic Acids Res* 26:33–37.
4. Gargalovic PS, M Imura, B Zhang, NM Gharavi, MJ Clark, J Pagnon, WP Yang, A He, A Truong, et al. (2006). Identification of inflammatory gene modules based on variations of human endothelial cell responses to oxidized lipids. *Proc Natl Acad Sci U S A* 103:12741–12746.
5. Ross ME, R Mahfouz, M Onciu, HC Liu, X Zhou, G Song, SA Shurtleff, S Pounds, C Cheng, et al. (2004). Gene expression profiling of pediatric acute myelogenous leukemia. *Blood* 104:3679–3687.
6. Su AL, MP Cook, KA Ching, Y Hakak, JR Walker, T Wiltshire, AP Orth, RG Vega, LM Sapinoso, et al. (2002). Large-scale analysis of the human and mouse transcriptomes. *Proc Natl Acad Sci U S A* 99:4465–4470.
7. Visala RD, GM Boyle, PG Pearsons, K Watson and GL Jones. (2003). Influence of ageing, heat shock treatment and *in vivo* total antioxidant status on gene-expression profile and protein synthesis in human peripheral lymphocytes. *Mech Aging Dev* 124:55–69.
8. Conard S, M Renninger and J Hennenlotter. (2008). Generation of pluripotent stem cells from human testis. *Nature* 456:344–349.
9. Schaefer CF, K Anthony, S Krupa, J Buchoff, M Day, T Hannay and KH Buetow. (2009). PID: the pathway interaction database. *Nucleic Acids Res* 37 (Sup.1):D674–D679.
