# Supplementary material
Source: PubMed Central journal article supplement (PMC3887405)
Supplement: Supp_Fig1.pdf [file Supp_Fig1.pdf]

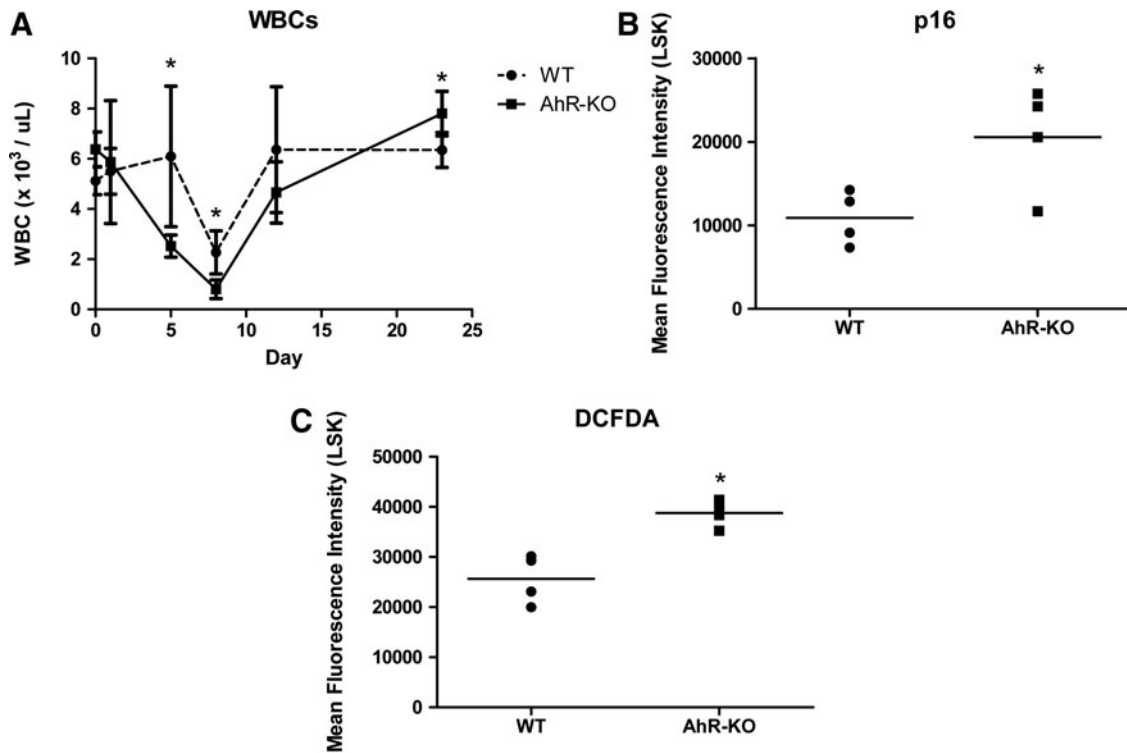

**SUPPLEMENTARY FIG. S1.** Young mice lacking aryl hydrocarbon receptor (AhR) are more sensitive to hematopoietic stress [5-fluorouracil (5-FU)]. **(A)** White blood cell counts of wild type (WT) and AhR-KO mice were done at different intervals after 5-FU (150 mg/kg) treatment (WT  $n=4$ ; AhR-KO  $n=4$ ). **(B)**  $\text{Lin}^-$  cells were isolated from bone marrow (BM) cells 6 days post 5-FU treatment. These cells were stained for Sca-1, cKit cell surface markers, and then intracellular staining was done for p16 (WT  $n=6$ ; AhR-KO  $n=6$ ). **(C)**  $\text{Lin}^-$  cells from 6 days post 5-FU treated WT and AhR-KO mice were stained for Sca-1 and cKit surface markers and intracellular with dichlorofluorescein diacetate (DCFDA) (WT  $n=6$ ; AhR-KO  $n=6$ ). Values presented are mean  $\pm$ SD of WBC counts **(A)** and mean fluorescence intensity of p16 and DCFDA staining in  $\text{Lin}^- / \text{Sca-1}^+ / \text{c-kit}^+$  (LSK) cells **(B, C)**. \*values presented were significantly different from control ( $P < 0.05$ ).
