# Supplementary material
Source: PubMed Central journal article supplement (PMC3887405)
Supplement: Supp_Fig2.pdf [file Supp_Fig2.pdf]

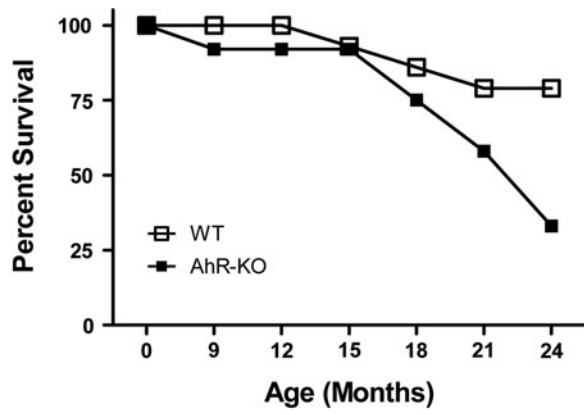

SUPPLEMENTARY FIG. S2. Aging AhR-KO mice have lower survival rate. Data are presented as percent survival of AhR-KO ( $n=12$ ) and WT ( $n=14$ ) mice up to 24 months of age.
