# Supplementary material
Source: PubMed Central journal article supplement (PMC3887405)
Supplement: Supp_Fig3.pdf [file Supp_Fig3.pdf]

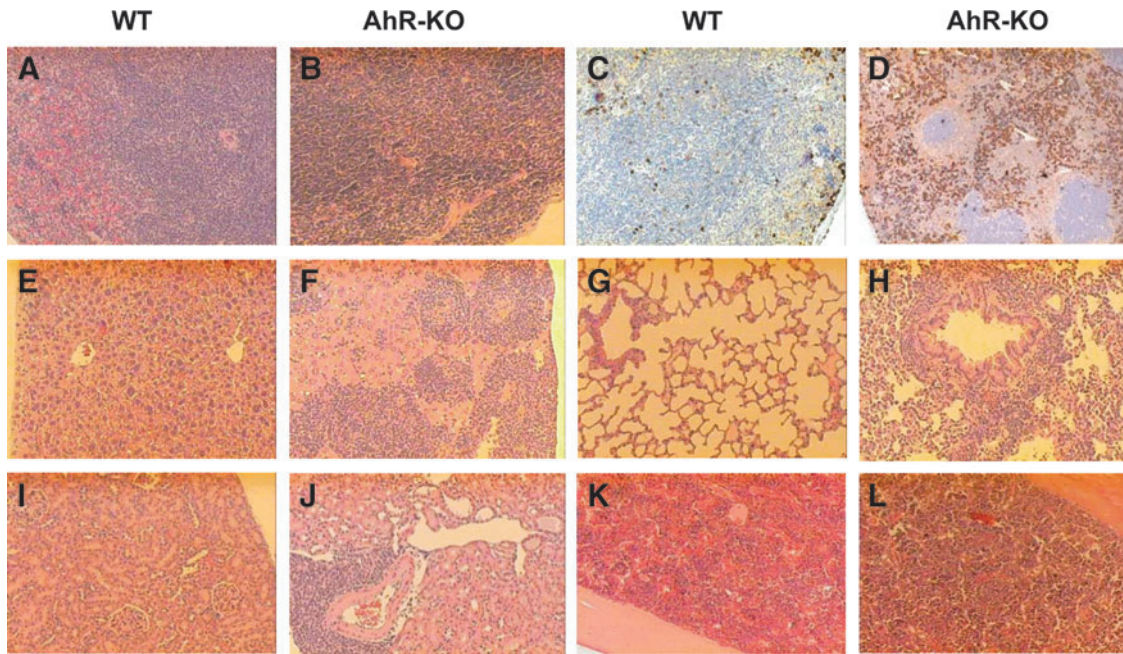

**SUPPLEMENTARY FIG. S3.** Twenty-four-month old AhR-KO mice have abnormal pathology in various organs and increased Ki67 staining in spleen cells. Photomicrographs (100× magnification) of H&E stained spleen (A, B), liver (E, F), lung (G, H), kidney (I, J), and femur (K, L) sections. Spleen sections were also stained with Ki67 antibody (C, D). Six separate tissue samples each from AhR-KO and WT mice were examined and representative sections are shown.
