# Supplementary material
Source: PubMed Central journal article supplement (PMC3887405)
Supplement: Supp_Fig4.pdf [file Supp_Fig4.pdf]

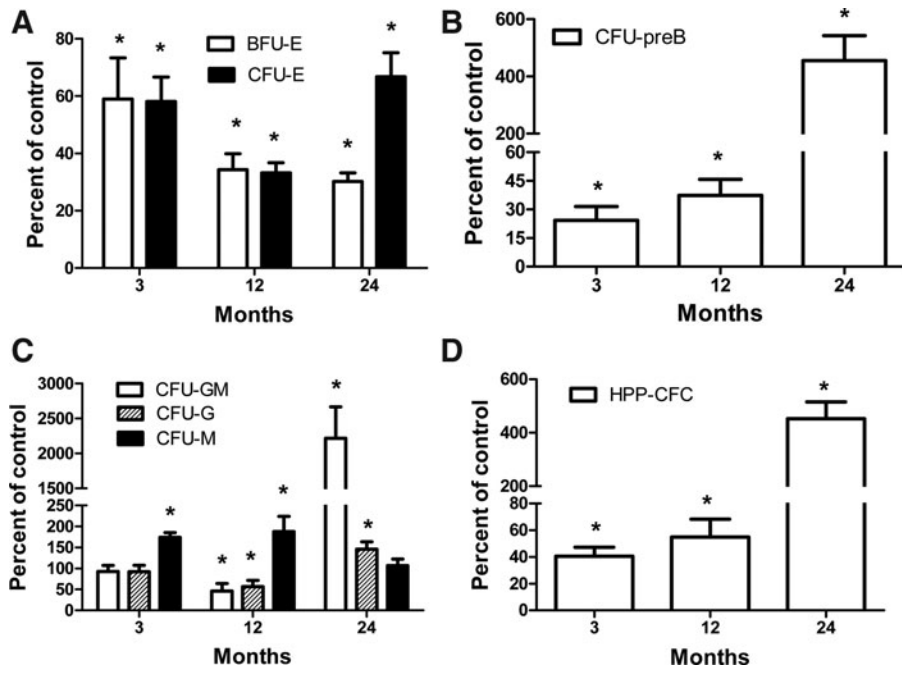

**SUPPLEMENTARY FIG. S4.** BM primitive progenitor cells from aging KO mice have altered colony-forming ability. BM cells from 3-, 12-, and 24-month old mice ( $n=5-6$ ) were used for colony-forming assays BFU-E and CFU-E (**A**), CFU-preB (**B**), CFU-GM, CFU-G, CFU-M (**C**), and HPP-CFC (**D**). Data for AhR-KO cells are expressed as percent of WT, and are as mean  $\pm$  S.D. \*values significantly different from control ( $P < 0.05$ ).
