# Supplementary material
Source: PubMed Central journal article supplement (PMC3887405)
Supplement: Supp_Fig5.pdf [file Supp_Fig5.pdf]

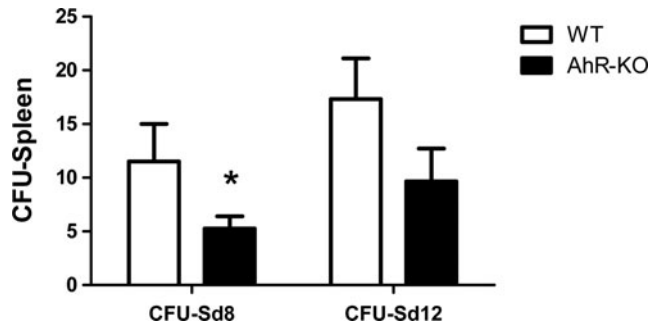

**SUPPLEMENTARY FIG. S5.** BM cells from aging AhR-KO mice have lower colony forming ability in vivo assessed by colony forming unit-spleen day 8 and 12. BM cells from the 24-month old donor AhR-KO and WT mice ( $n=4$ ) were injected intravenously into irradiated recipient mice ( $n=6$  each). At day 8 and 12, spleens from the recipient mice were isolated, fixed, and number of nodules formed on the spleen were counted. Data presented as mean  $\pm$  S.D. \*values significantly different from control ( $P < 0.05$ ).
