# Supplementary material
Source: PubMed Central journal article supplement (PMC3887405)
Supplement: Supp_Fig6.pdf [file Supp_Fig6.pdf]

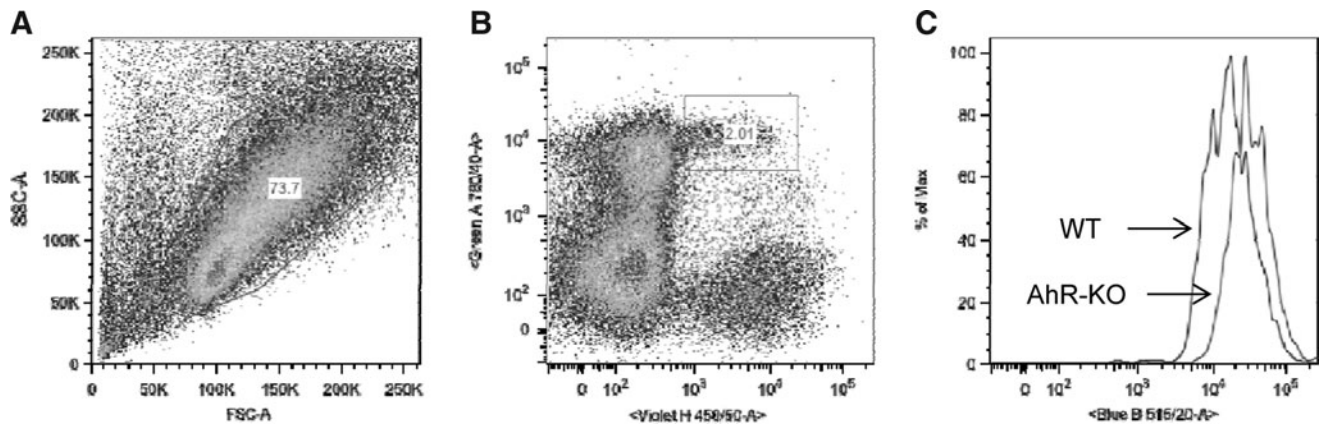

**SUPPLEMENTARY FIG. S6.** Gating scheme for LSK cells from stained  $Lin^{-}$  cells. The gated cells were selected and mean fluorescence intensity (MFI) profile of DCFDA staining was generated (A–C) [cKit-PE-Cy7 (Green A), Sca-1-Pacific Blue (Violet H), DCFDA (Blue B)]. The MFI of individual antibody staining (Ki-67, p16<sup>Ink4a</sup> and  $\gamma$ -H2A.X) was also generated.
