# Supplementary material
Source: PubMed Central journal article supplement (PMC3887405)
Supplement: Supp_Fig7.pdf [file Supp_Fig7.pdf]

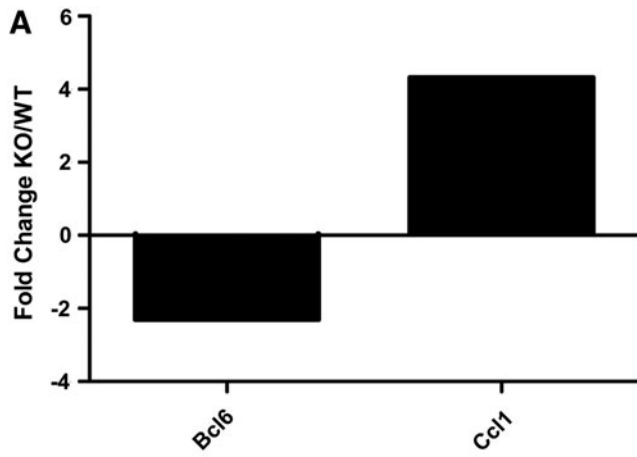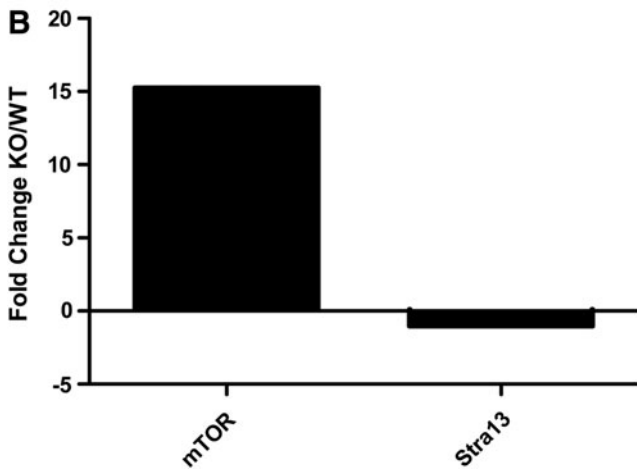

**SUPPLEMENTARY FIG. S7.** Validation of selected changed genes from spleen cell RT-PCR array (**A**) and microarray data of SLAM+ cells from BM (**B**) of WT and AhR-KO mice. Data shown are representative of two experiments (mean,  $n=2$  mice).
