# Supplementary material
Source: PubMed Central journal article supplement (PMC3887405)
Supplement: Supp_Table1.pdf [file Supp_Table1.pdf]

SUPPLEMENTARY TABLE S1. SET OF PRIMERS USED FOR  
QUANTITATIVE REAL-TIME PCR AND GENE VALIDATION  
ASSAYS (TAQMAN GENE EXPRESSION ASSAYS, APPLIED  
BIOSCIENCES)

| <i>Gene</i>   | <i>Catalog number</i> |
|---------------|-----------------------|
| <i>Gata-1</i> | Mm01352636_m1         |
| <i>Sh2d3c</i> | Mm00449884_m1         |
| <i>Gfi-1</i>  | Mm00515853_m1         |
| <i>P21</i>    | Mm01303209_m1         |
| <i>c-Myc</i>  | Mm00487804_m1         |
| <i>Gapdh</i>  | Mm99999915_g1         |
| <i>Bcl6</i>   | Mm0047763_m1          |
| <i>Ccl1</i>   | Mm00441236_m1         |
| <i>mTOR</i>   | Mm00444968_m1         |
| <i>Stra13</i> | Mm00450185_m1         |
| <i>Hprt</i>   | Mm01545399_m1         |
