# Supplementary material
Source: PubMed Central journal article supplement (PMC3887405)
Supplement: Supp_Table2.pdf [file Supp_Table2.pdf]

SUPPLEMENTARY TABLE S2. THE TOP 20 DIFFERENTIAL UPREGULATED GENES EXPRESSION IN AHR-KO MICE

| Gene          | Gene title                                                                 | Location   | Transcript ID | Fold change | P values < |
|---------------|----------------------------------------------------------------------------|------------|---------------|-------------|------------|
| Krtap2-4      | Keratin associated protein 2-4                                             | chr11D     | NM_027800     | 10.32       | 0.00029    |
| Ccd90b        | Coiled-coil domain containing 90B, nuclear gene encoding mitochondria      | chr7E1     | NM_025515     | 8.96        | 0.00055    |
| Plekkg3       | Pleckstrin homology domain containing, family G (with RhoGef domain)       | ch12C3     | NM_153804     | 8.91        | 0.00739    |
| Srpk2         | Serine/arginine-rich protein specific kinase 2                             | chr5A3     | NM_009274     | 8.42        | 0.00229    |
| Cxcl9         | Chemokine (C-X-C motif) ligand 9                                           | chr5E2     | NM_008599     | 8.06        | 0.00222    |
| Hes1          | Hairy and enhancer of split 1                                              | chr16B2    | NM_008235     | 7.70        | 0.0415     |
| Atp5sl        | ATP5S-like                                                                 | chr7A3     | NM_025504     | 6.37        | 0.00209    |
| Pppde2        | PPPDE peptidase domain containing 2                                        | chr15E1    | NM_134095     | 6.31        | 0.00939    |
| Uimcl         | Ubiquitin interaction motif containing 1                                   | chr13B2    | NM_011307     | 5.94        | 0.00464    |
| 9530002B09Rik | RIKEN cDNA 950002B09                                                       | chr4D2.2   | NM_023865     | 5.60        | 0.00283    |
| Mir710        | MicroRNA 710                                                               | chr8       | NM_030491     | 5.58        | 0.00634    |
| Pdp1          | Pyruvate dehydrogenase phosphatase catalytic subunit 1                     | chr4A1     | NM_001033453  | 5.42        | 0.0393     |
| Rad50         | RAD50 homolog ( <i>Saccharomyces cerevisiae</i> )                          | chr11As-B1 | NM_009012     | 5.27        | 0.00383    |
| Zrb1          | Zinc finger CCHC-type and RNA binding motif 1                              | chr15F1    | NM_026025     | 4.57        | 0.00026    |
| Slc25a10      | Solute carrier family 25 (mitochondrial carrier dicarboxylate transporter) | chr11E2    | NM_013770     | 4.32        | 0.00010    |
| Mtor          | Mechanistic target of rapamycin (serine/threonine kinase)                  | chr4E1     | NM_020009     | 3.83        | 0.00244    |
| Mon1a         | MON1 homolog A (yeast)                                                     | chr9F1     | NM_028369     | 3.69        | 0.00925    |
| Jarid2        | Jumonji, AT rich interactive domain 2, transcript variant 1                | chr13A5    | NM_001205043  | 3.45        | 0.00397    |
| Creb1         | cAMP responsive element binding protein 1, transcript variant A            | chr1C2     | NM_133828     | 3.43        | 0.00828    |
| Uqcrc1        | Biquinol-cytochrome c reductase core protein 1                             | chr9F2     | NM_025407     | 3.33        | 0.00052    |
