# Supplementary material
Source: PubMed Central journal article supplement (PMC3887405)
Supplement: Supp_Table3.pdf [file Supp_Table3.pdf]

SUPPLEMENTARY TABLE S3. THE TOP 20 DIFFERENTIAL DOWNREGULATED GENES EXPRESSION IN AHR-KO MICE

| Gene          | Gene title                                                            | Location  | Transcript ID | Fold change | P values < |
|---------------|-----------------------------------------------------------------------|-----------|---------------|-------------|------------|
| Mdga2         | MAM domain containing glycosyl-phosphatidylinositol anchor 2          | chr12C2   | NM_001193266  | 0.035       | 0.00951    |
| Gm15097       | Predicted gene 15097                                                  | chrXF3    | NM_001198987  | 0.051       | 0.00269    |
| Eya1          | Eucaryotic translation initiation factor 4E member 2                  | chr1A3    | NM_010164     | 0.179       | 0.00223    |
| Nprl2         | Nitrogen permease regulator-like 2                                    | chr9F1    | NM_028369     | 0.184       | 0.00231    |
| 4933406K04Rik | RIKEN cDNA A330035P11                                                 | chr3p21.1 | NM_015512     | 0.184       | 0.00043    |
| B230208H11Rik | RIKEN cDNA B230208H11                                                 | chr10     | NR_038027     | 0.201       | 0.00440    |
| Lce1b         | Late cornified envelope 1B                                            | chr9p24.3 | NM_026822     | 0.272       | 0.00274    |
| Stra13        | Stimulated by retinoic acid 13                                        | chr11E2   | NM_016665     | 0.282       | 0.00137    |
| LOC432562     | Uncharacterized LOC432562                                             | chr11B1.3 | NR_040284     | 0.288       | 0.00353    |
| Cilp          | Cartilage intermediate layer protein, nucleotide pyrophosphohydrolase | chr9C     | NM_173385     | 0.294       | 0.00490    |
| Dtnb          | Dystrobrevin, beta                                                    | chr12A1.1 | NM_007886     | 0.301       | 0.00928    |
| 2610016A17Rik | RIKEN cDNA 2610016A17                                                 | chr19     | NR_045347     | 0.336       | 0.00099    |
| Olf1057       | Olfactory receptor 1057                                               | chr2D     | NM_207563     | 0.356       | 0.00251    |
| Car2          | Carbonic anhydrase                                                    | chr3A1    | NM_009801     | 0.367       | 0.00168    |
| 2700086A05Rik | RIKEN cDNA 2700086A05                                                 | chr6      | NR_015611     | 0.373       | 0.00598    |
| D630013N20Rik | RIKEN cDNA D630013N20                                                 | chr10     | NR_045291     | 0.382       | 0.00537    |
| Muc5ac        | Mucin 5, subtypes A and C, tracheobronchial/gastric                   | chr7F5    | NM_010844     | 0.392       | 0.00787    |
| Olf857        | Olfactory receptor 857                                                | chr9A3    | NM_001012265  | 0.392       | 0.00917    |
| Smyd1         | SET and MYND domain containing 1                                      | chr6C1    | NM_001160127  | 0.415       | 0.00573    |
| Zfp964        | Zinc finger protein 964                                               | chr8E1    | NM_009569     | 0.418       | 0.00489    |
