# Supplementary material
Source: PubMed Central journal article supplement (PMC3887405)
Supplement: Supp_Table4-11.pdf [file Supp_Table4-11.pdf]

SUPPLEMENTARY TABLE S4. GSEA RESULTS SUMMARY OF GENESet MIPS\_18S\_U11\_U12\_SNRNP

| Gene symbol                       | Gene_title                                                            | Rank in gene list | Rank metric score | Running ES | Core enrichment | KO/WT                                 |
|-----------------------------------|-----------------------------------------------------------------------|-------------------|-------------------|------------|-----------------|---------------------------------------|
| Dataset                           |                                                                       |                   |                   |            |                 | KOvsWTforGSEA.KOvsWT.cls#KO_versus_WT |
| Phenotype                         |                                                                       |                   |                   |            |                 | KOvsWT.cls#KO_versus_WT               |
| Upregulated in class              |                                                                       |                   |                   |            |                 | KO                                    |
| GeneSet                           |                                                                       |                   |                   |            |                 | MIPS_18S_U11_U12_SNRNP                |
| Enrichment score (ES)             |                                                                       |                   |                   |            |                 | 0.5717312                             |
| Normalized enrichment score (NES) |                                                                       |                   |                   |            |                 | 1.9153707                             |
| Nominal P-value                   |                                                                       |                   |                   |            |                 | 0.0023696683                          |
| FDR q-value                       |                                                                       |                   |                   |            |                 | 0.1871023                             |
| FWER P-value                      |                                                                       |                   |                   |            |                 | 0.731                                 |
| Gene symbol                       | Gene_title                                                            | Rank in gene list | Rank metric score | Running ES | Core enrichment | KO/WT                                 |
| ZCRB1                             | zinc finger CCHC-type and RNA binding motif 1                         | 6                 | 2.379735          | 0.2199     | Yes             | 4.58                                  |
| RNPC3                             | RNA-binding region (RNP1, RRM) containing 3                           | 699               | 0.879432          | 0.272856   | Yes             | 18.27                                 |
| SNRNP25                           | Small nuclear ribonucleoprotein 25                                    | 705               | 0.877784          | 0.353854   | Yes             | 4.02                                  |
| SNRNP3                            | Small nuclear ribonucleoprotein D3 polypeptide 18 kDa                 | 1020              | 0.77935           | 0.413064   | Yes             | 1.93                                  |
| SNRPD1                            | Small nuclear ribonucleoprotein D1 polypeptide 16 kDa                 | 2640              | 0.556754          | 0.398126   | Yes             | 1.48                                  |
| SF3B5                             | Splicing factor 3b, subunit 5, 10 kDa                                 | 2667              | 0.555512          | 0.448449   | Yes             | 1.52                                  |
| SNRNPB                            | Small nuclear ribonucleoprotein polypeptides B and B1                 | 2840              | 0.541204          | 0.491456   | Yes             | 2.83                                  |
| PRPF8                             | PRP8 pre-mRNA processing factor 8 homolog ( <i>S. cerevisiae</i> )    | 2851              | 0.540087          | 0.541009   | Yes             | 1.52                                  |
| SNRNP35                           | Small nuclear ribonucleoprotein 35                                    | 3286              | 0.506506          | 0.570054   | Yes             | 3.22                                  |
| SNRNP2                            | Small nuclear ribonucleoprotein D2 polypeptide 16.5 kDa               | 4232              | 0.43464           | 0.57148    | Yes             | 1.22                                  |
| ZRSR2                             | Zinc finger (CCCH type), RNA-binding motif and serine/arginine rich 2 | 5078              | 0.377578          | 0.571731   | Yes             | 1.62                                  |
| DHX15                             | DEAH (Asp-Glu-Ala-His) box polypeptide 15                             | 6388              | 0.292184          | 0.545041   | No              | 1.16                                  |
| SF3B1                             | Splicing factor 3b, subunit 1, 155 kDa                                | 6536              | 0.283142          | 0.565201   | No              | 1.32                                  |
| PDCCD7                            | Programmed cell death 7                                               | 9204              | 0.125078          | 0.46732    | No              | 1.25                                  |
| SNRPE                             | Small nuclear ribonucleoprotein polypeptide E                         | 11254             | 0.010701          | 0.384221   | No              | 1.00                                  |
| SNRPG                             | Small nuclear ribonucleoprotein polypeptide G                         | 11523             | -0.00471          | 0.373659   | No              | 1.00                                  |
| YBX1                              | Y box binding protein 1                                               | 12020             | -0.03265          | 0.356324   | No              | 0.98                                  |
| SF3B2                             | Splicing factor 3b, subunit 2, 145 kDa                                | 12457             | -0.05652          | 0.343659   | No              | 0.96                                  |
| ZMAT5                             | Zinc finger, matrix type 5                                            | 12459             | -0.05665          | 0.348859   | No              | 0.86                                  |
| SF3B4                             | Splicing factor 3b, subunit 4, 49 kDa                                 | 15531             | -0.2238           | 0.243531   | No              | 0.56                                  |
| SF3B3                             | Splicing factor 3b, subunit 3, 130 kDa                                | 22121             | -0.6362           | 0.031979   | No              | 0.01                                  |
| SNRNP48                           | Small nuclear ribonucleoprotein 48                                    | 22337             | -0.65957          | 0.084171   | No              | 0.51                                  |

SUPPLEMENTARY TABLE S5. GSEA RESULTS SUMMARY OF GENESet OF INFLAMMATORY GENE VARIATIONS OF HUMAN ENDOTHELIAL CELL RESPONSES TO OXIDIZED LIPIDS

| Gene symbol | Gene_title                                                 | Rank in gene list | Rank metric score | Running ES | Core enrichment | KO/WT |
|-------------|------------------------------------------------------------|-------------------|-------------------|------------|-----------------|-------|
| CCDC68      | Coiled-coil domain containing 68                           | 1699              | 0.646615          | 0.058796   | Yes             | 1.67  |
| IRAK2       | Interleukin-1 receptor-associated kinase 2                 | 2197              | 0.590166          | 0.155688   | Yes             | 6.37  |
| DUSP5       | Dual specificity phosphatase 5                             | 2294              | 0.580959          | 0.267203   | Yes             | 2.04  |
| HERPUD2     | HERPUD family member 2                                     | 2312              | 0.579404          | 0.38165    | Yes             | 1.74  |
| ADAMTS1     | ADAM metalloproteinase with thrombospondin type 1 motif, 1 | 2366              | 0.576131          | 0.49397    | Yes             | 12.27 |
| RORA        | RAR-related orphan receptor A                              | 2372              | 0.575657          | 0.608164   | Yes             | 13.54 |
| EMP1        | Epithelial membrane protein 1                              | 4975              | 0.383721          | 0.577668   | No              | 3.49  |
| ADAMTS9     | ADAM metalloproteinase with thrombospondin type 1 motif, 9 | 10115             | 0.075885          | 0.381909   | No              | 1.06  |
| LBH         | Limb bud and heart development                             | 11289             | 0.009029          | 0.335578   | No              | 1.01  |
| SOS1        | Son of sevenless homolog 1 (Drosophila)                    | 12781             | -0.07456          | 0.289223   | No              | 0.89  |
| NAV3        | Neuron navigator 3                                         | 13183             | -0.09554          | 0.291758   | No              | 0.82  |
| FNIP1       | Folliculin interacting protein 1                           | 13580             | -0.11815          | 0.298991   | No              | 0.73  |
| TFEC        | Transcription factor EC                                    | 14492             | -0.16639          | 0.294681   | No              | 0.78  |
| TRIM16      | Tripartite motif-containing 16                             | 15869             | -0.24185          | 0.28629    | No              | 0.78  |
| ARRDC4      | Arrestin domain containing 4                               | 17165             | -0.31793          | 0.296341   | No              | 0.53  |

Dataset  
 KOvsWTforGSEA.KOvsWT.cls#KO\_vsus\_WT  
 Phenotype  
 Upregulated in class  
 GeneSet  
 KOvsWT.cls#KO\_vsus\_WT  
 ES  
 KO  
 GARGALOVIC\_RESPONSE\_TO\_OXIDIZED\_PHOSPHOLIPIDS\_GREY\_UP  
 NES  
 0.60816413  
 1.845696  
 Nominal P-value  
 0.0023094688  
 FDR q-value  
 0.22862837  
 FWER P-Value  
 0.94

SUPPLEMENTARY TABLE S6. GSEA RESULTS SUMMARY OF GENE EXPRESSION PROFILING OF PEDIATRIC ACUTE MYELOGENOUS LEUKEMIA

| Dataset              |                                                                                | KOvsWTforGSEA.KOvsWT.cls#KO_ versus_WT |                          |                   |                        |              |
|----------------------|--------------------------------------------------------------------------------|----------------------------------------|--------------------------|-------------------|------------------------|--------------|
| Phenotype            |                                                                                | KOvsWT.cls#KO_ versus_WT               |                          |                   |                        |              |
| Upregulated in class |                                                                                | KO                                     |                          |                   |                        |              |
| GeneSet              |                                                                                | ROSS_AML_WITH_CBFB_MYH11_FUSION        |                          |                   |                        |              |
| ES                   |                                                                                | 0.4514762                              |                          |                   |                        |              |
| NES                  |                                                                                | 1.8177781                              |                          |                   |                        |              |
| Nominal P-value      |                                                                                | 0.0024875621                           |                          |                   |                        |              |
| FDR q-value          |                                                                                | 0.2690509                              |                          |                   |                        |              |
| FWER P-value         |                                                                                | 0.974                                  |                          |                   |                        |              |
| <i>Gene symbol</i>   | <i>Gene_title</i>                                                              | <i>Rank in gene list</i>               | <i>Rank metric score</i> | <i>Running ES</i> | <i>Core enrichment</i> | <i>KO/WT</i> |
| HPCAL1               | Hippocalcin-like 1                                                             | 49                                     | 1.649472356              | 0.07114862        | Yes                    | 2.24         |
| CFP                  | Complement factor properdin                                                    | 176                                    | 1.239297748              | 0.12094103        | Yes                    | 2.47         |
| TGFB1                | Transforming growth factor, beta-induced, 68 kDa                               | 1434                                   | 0.692949951              | 0.10003945        | Yes                    | 7.48         |
| CTSS                 | Cathepsin S                                                                    | 1493                                   | 0.683476031              | 0.12797207        | Yes                    | 2.87         |
| CLEC10A              | C-type lectin domain family 10, member A                                       | 1545                                   | 0.675664723              | 0.15584579        | Yes                    | 12.34        |
| SLC38A1              | Solute carrier family 38, member 1                                             | 1575                                   | 0.670774043              | 0.18440633        | Yes                    | 2.66         |
| PLBD1                | Phospholipase B domain containing 1                                            | 1600                                   | 0.665722013              | 0.21294819        | Yes                    | 5.77         |
| CCR2                 | Chemokine (C-C motif) receptor 2                                               | 1792                                   | 0.635456264              | 0.23328732        | Yes                    | 4.09         |
| LGALS2               | Lectin, galactoside-binding, soluble, 2 (galectin 2)                           | 2019                                   | 0.608251929              | 0.25098205        | Yes                    | 1.74         |
| GIMAP4               | GTPase, IMAP family member 4                                                   | 2370                                   | 0.575773001              | 0.26214233        | Yes                    | 2.21         |
| CH13L1               | Chitinase 3-like 1 (cartilage glycoprotein-39)                                 | 2793                                   | 0.545612037              | 0.2690071         | Yes                    | 2.34         |
| MEGF9                | Multiple EGF-like-domains 9                                                    | 2823                                   | 0.543178141              | 0.29190817        | Yes                    | 2.23         |
| CYBB                 | Cytochrome b-245, beta polypeptide (chronic granulomatous disease)             | 2926                                   | 0.534000516              | 0.31144034        | Yes                    | 8.87         |
| ST18                 | Suppression of tumorigenicity 18 (breast carcinoma) (zinc finger protein)      | 3117                                   | 0.519149125              | 0.32662487        | Yes                    | 1.74         |
| CBFB                 | Core-binding factor, beta subunit                                              | 3120                                   | 0.518837154              | 0.34955546        | Yes                    | 1.59         |
| CEBPD                | CCAAT/enhancer binding protein (C/EBP), delta                                  | 3338                                   | 0.502948821              | 0.36294925        | Yes                    | 2.54         |
| CD52                 | CD52 molecule                                                                  | 3608                                   | 0.482027024              | 0.37327892        | Yes                    | 2.12         |
| NRP1                 | Neuropilin 1                                                                   | 3620                                   | 0.481240988              | 0.39417222        | Yes                    | 2.45         |
| ANXA11               | Annexin A11                                                                    | 3938                                   | 0.456828654              | 0.4014124         | Yes                    | 4.64         |
| SPARC                | Secreted protein, acidic, cysteine-rich (osteonectin)                          | 3948                                   | 0.456404716              | 0.42128628        | Yes                    | 2.67         |
| AK5                  | Adenylate kinase 5                                                             | 4009                                   | 0.451549619              | 0.43884978        | Yes                    | 2.17         |
| SLC7A7               | Solute carrier family 7 (cationic amino acid transporter, y+ system), member 7 | 4178                                   | 0.440265894              | 0.4514762         | Yes                    | 3.99         |
| NAGA                 | N-acetylgalactosaminidase, alpha-                                              | 4782                                   | 0.397178382              | 0.44432184        | No                     | 1.97         |
| TES                  | Testis derived transcript (3 LIM domains)                                      | 5502                                   | 0.350123972              | 0.4303152         | No                     | 1.62         |
| FYB                  | FYN binding protein (FYB-120/130)                                              | 6089                                   | 0.311039805              | 0.42003858        | No                     | 2.00         |
| KCID12               | Potassium channel tetramerisation domain containing 12                         | 6310                                   | 0.297059417              | 0.42417702        | No                     | 1.99         |
| PTPRM                | Protein tyrosine phosphatase, receptor type, M                                 | 6731                                   | 0.271892458              | 0.41898325        | No                     | 1.48         |
| MYH11                | Myosin, heavy chain 11, smooth muscle                                          | 6826                                   | 0.267038643              | 0.42696613        | No                     | 1.27         |
| LPAR1                | Lysophosphatidic acid receptor 1                                               | 8319                                   | 0.179532111              | 0.37363845        | No                     | 1.13         |
| S100A8               | S100 calcium binding protein A8                                                | 9429                                   | 0.11423514               | 0.33314806        | No                     | 1.18         |
| S100A9               | S100 calcium binding protein A9                                                | 11606                                  | -0.009887209             | 0.24419744        | No                     | 0.98         |
| NACC2                | Nucleus accumbens associated 2, BEN and BTB (POZ) domain containing            | 11851                                  | -0.023757331             | 0.23522778        | No                     | 0.99         |

(continued)

SUPPLEMENTARY TABLE S6. (CONTINUED)

| <i>Gene symbol</i> | <i>Gene_title</i>                                                                    | <i>Rank in gene list</i> | <i>Rank metric score</i> | <i>Running ES</i> | <i>Core enrichment</i> | <i>KO/WT</i> |
|--------------------|--------------------------------------------------------------------------------------|--------------------------|--------------------------|-------------------|------------------------|--------------|
| GRHRP              | Glyoxylate reductase/hydroxypyruvate reductase                                       | 12353                    | -0.050696608             | 0.21689554        | No                     | 0.85         |
| IL13RA1            | Interleukin 13 receptor, alpha 1                                                     | 12523                    | -0.060985543             | 0.21265808        | No                     | 0.95         |
| PLXNB2             | Plexin B2                                                                            | 16029                    | -0.250425041             | 0.079781644       | No                     | 0.69         |
| DUSP6              | Dual specificity phosphatase 6                                                       | 16361                    | -0.270227253             | 0.0781701         | No                     | 0.77         |
| MEF2A              | MADS box transcription enhancer factor 2, polypeptide A (myocyte enhancer factor 2A) | 17019                    | -0.309347481             | 0.06490178        | No                     | 0.45         |
| TNFAIP2            | Tumor necrosis factor, alpha-induced protein 2                                       | 17828                    | -0.35370788              | 0.047398016       | No                     | 0.37         |
| CLEC7A             | C-type lectin domain family 7, member A                                              | 19973                    | -0.478776753             | -0.019440688      | No                     | 0.17         |
| QPCT               | Glutaminyl-peptide cyclotransferase (glutaminyl cyclase)                             | 19980                    | -0.47925958              | 0.001570153       | No                     | 0.65         |
| IL10RA             | Interleukin 10 receptor, alpha                                                       | 20430                    | -0.501668096             | 0.005376662       | No                     | 0.02         |
| MN1                | Meningioma (disrupted in balanced translocation) 1                                   | 21427                    | -0.571854532             | -0.010174272      | No                     | 0.41         |
| PGM1               | Phosphoglucomutase 1                                                                 | 22404                    | -0.667900324             | -0.02064355       | No                     | 0.18         |
| KIF17              | Kinesin family member 17                                                             | 22527                    | -0.68552202              | 0.004750726       | No                     | 0.61         |
| MTMR11             | Myotubularin related protein 11                                                      | 22801                    | -0.729974508             | 0.025913656       | No                     | 0.42         |
| MDFIC              | MyoD family inhibitor domain containing                                              | 23539                    | -0.884654582             | 0.03487642        | No                     | 0.42         |

SUPPLEMENTARY TABLE S7. GSEA RESULTS SUMMARY FROM ANALYSIS OF THE HUMAN AND MOUSE TRANSCRIPTOMES

| <i>Gene symbol</i> | <i>Gene_title</i>                                                      | <i>Rank in gene list</i> | <i>Rank metric score</i> | <i>Running ES</i> | <i>Core enrichment</i> | <i>KO/WT</i> |
|--------------------|------------------------------------------------------------------------|--------------------------|--------------------------|-------------------|------------------------|--------------|
| ETS1               | v-ets erythroblastosis virus E26 oncogene homolog 1 (avian)            | 64                       | 1.533523                 | 0.151507          | Yes                    | 2.04         |
| MYB                | v-myb myeloblastosis viral oncogene homolog (avian)                    | 238                      | 1.15292                  | 0.260288          | Yes                    | 1.70         |
| MMP12              | Matrix metalloproteinase 12 (macrophage elastase)                      | 466                      | 0.979138                 | 0.349386          | Yes                    | 1.52         |
| CCR9               | Chemokine (C-C motif) receptor 9                                       | 626                      | 0.909821                 | 0.434307          | Yes                    | 2.94         |
| SLAMF1             | Signaling lymphocytic activation molecule family member 1              | 1167                     | 0.745323                 | 0.487063          | Yes                    | 4.55         |
| IRF8               | Interferon regulatory factor 8                                         | 1753                     | 0.640505                 | 0.527436          | Yes                    | 3.34         |
| ITK                | IL2-inducible T-cell kinase                                            | 2100                     | 0.600001                 | 0.573545          | Yes                    | 6.11         |
| CYTIP              | Cytohesin 1 interacting protein                                        | 2698                     | 0.552692                 | 0.6046            | Yes                    | 9.16         |
| RHOH               | Ras homolog gene family, member H                                      | 4915                     | 0.387292                 | 0.552603          | No                     | 3.60         |
| NCK2               | NCK adaptor protein 2                                                  | 5434                     | 0.35464                  | 0.566993          | No                     | 2.82         |
| TRAF3IP3           | TRAF3 interacting protein 3                                            | 6890                     | 0.262645                 | 0.533692          | No                     | 1.38         |
| PAX1               | Paired box gene 1                                                      | 11970                    | -0.03044                 | 0.328356          | No                     | 0.96         |
| PIK3CD             | Phosphoinositide-3-kinase, catalytic, delta polypeptide                | 14426                    | -0.16321                 | 0.24403           | No                     | 0.75         |
| ADAMDEC1           | ADAM-like, decysin 1                                                   | 14631                    | -0.17464                 | 0.253213          | No                     | 0.78         |
| IRF4               | Interferon regulatory factor 4                                         | 17712                    | -0.34725                 | 0.16174           | No                     | 0.69         |
| GNA13              | Guanine nucleotide binding protein (G protein), alpha 13               | 20512                    | -0.50679                 | 0.097832          | No                     | 0.42         |
| SH2D1A             | SH2 domain protein 1A, Duncan's disease (lymphoproliferative syndrome) | 21825                    | -0.60852                 | 0.105162          | No                     | 0.37         |

Dataset KOvsWTforGSEA.KOvsWT.cls#KO\_versus\_WT  
 Phenotype KOvsWT.cls#KO\_versus\_WT  
 Upregulated in class KO  
 GeneSet SU\_THYMUS  
 ES 0.60460025  
 NES 1.8951225  
 Nominal P-value 0.0043196543  
 FDR q-value 0.19467275  
 FWER P-value 0.8

SUPPLEMENTARY TABLE S8. GSEA RESULTS SUMMARY FROM GENE-EXPRESSION PROFILE OF AGEING, HEATSHOCK TREATMENT, AND IN VIVO TOTAL ANTIOXIDANT STATUS AND PROTEIN SYNTHESIS IN HUMAN PERIPHERAL LYMPHOCYTES

| Gene symbol | Gene_title                                                                         | Rank in gene list | Rank metric score | Running ES | Core enrichment | KO/WT |
|-------------|------------------------------------------------------------------------------------|-------------------|-------------------|------------|-----------------|-------|
| SOAT1       | Sterol O-acyltransferase (acyl-coenzyme A: cholesterol acyltransferase) 1          | 2040              | 0.605698          | -0.00296   | No              | 1.89  |
| FDFT1       | Farnesyl-diphosphate farnesyltransferase 1                                         | 4245              | 0.433794          | -0.03557   | No              | 2.86  |
| CDC16       | GDC16 cell division cycle 16 homolog ( <i>S. cerevisiae</i> )                      | 4508              | 0.416594          | 0.009221   | No              | 1.95  |
| STAT4       | Signal transducer and activator of transcription 4                                 | 6479              | 0.2869            | -0.03337   | No              | 1.46  |
| LGALS3      | Lectin, galactoside-binding, soluble, 3 (galectin 3)                               | 7929              | 0.199467          | -0.06623   | No              | 1.59  |
| NDUFS4      | NADH dehydrogenase (ubiquinone) Fe-S protein 4, 18 kDa (NADH-coenzyme Q reductase) | 8226              | 0.184476          | -0.05378   | No              | 1.16  |
| PLIN2       | Perilipin 2                                                                        | 8732              | 0.153073          | -0.0541    | No              | 1.38  |
| SDC4        | Syndecan 4 (amphiglycan, ryudocan)                                                 | 11411             | 0.001504          | -0.16378   | No              | 1.00  |
| COL9A3      | Collagen, type IX, alpha 3                                                         | 11986             | -0.03132          | -0.18316   | No              | 0.97  |
| PLA2G16     | Phospholipase A2, group XVI                                                        | 12485             | -0.0585           | -0.19579   | No              | 0.89  |
| RUNX3       | Runt-related transcription factor 3                                                | 20939             | -0.53332          | -0.47154   | Yes             | 0.45  |
| GNAI5       | Guanine nucleotide binding protein (G protein), alpha 15 (Gq class)                | 21227             | -0.5544           | -0.40941   | Yes             | 0.37  |
| PCMT1       | Protein-L-isoaspartate (D-aspartate) O-methyltransferase                           | 21444             | -0.57335          | -0.34184   | Yes             | 0.24  |
| UFDL1       | Ubiquitin fusion degradation 1 like (yeast)                                        | 21818             | -0.60805          | -0.27609   | Yes             | 0.21  |
| KDM6A       | Lysine (K)-specific demethylase 6A                                                 | 22218             | -0.64574          | -0.20637   | Yes             | 0.29  |
| CDK18       | Cyclin-dependent kinase 18                                                         | 22446             | -0.67368          | -0.12588   | Yes             | 0.59  |
| TXK         | TXK tyrosine kinase                                                                | 22603             | -0.699            | -0.03909   | Yes             | 0.52  |
| NRG2        | Neuregulin 2                                                                       | 23380             | -0.84236          | 0.041361   | Yes             | 0.64  |

Dataset KOvsWTforGSEA.KOvsWT.cls#KO\_versus\_WT  
 Phenotype KOvsWT.cls#KO\_versus\_WT  
 Upregulated in class WT  
 GeneSet VISALA\_AGING\_LYMPHOCYTE\_DN  
 ES -0.54264146  
 NES -1.6509995  
 Nominal P-value 0.011299435  
 FDR q-value 1.0  
 FWER P-value 1.0

SUPPLEMENTARY TABLE S9. GSEA RESULTS SUMMARY FROM GENE EXPRESSION IN PLEURIPOTENT STEM CELLS FROM HUMAN TESTIS

| Gene symbol | Gene_title                                                                                                | Rank in gene list | Rank metric score | Running ES | Core enrichment | KO/WT |
|-------------|-----------------------------------------------------------------------------------------------------------|-------------------|-------------------|------------|-----------------|-------|
| MYC         | v-myc myelocytomatosis viral oncogene homolog (avian)                                                     | 1295              | 0.719384          | -0.00981   | No              | 1.88  |
| HSPA4       | Heat shock 70 kDa protein 4                                                                               | 1681              | 0.64919           | 0.013511   | No              | 2.05  |
| KLF4        | Kruppel-like factor 4 (gut)                                                                               | 2336              | 0.577699          | 0.021479   | No              | 12.31 |
| POU6F1      | POU domain, class 6, transcription factor 1                                                               | 2917              | 0.534371          | 0.029874   | No              | 1.93  |
| REXO1       | REX1, RNA exonuclease 1 homolog ( <i>S. cerevisiae</i> )                                                  | 2954              | 0.531518          | 0.060436   | No              | 2.37  |
| GDF3        | Growth differentiation factor 3                                                                           | 3593              | 0.483325          | 0.063372   | No              | 2.22  |
| TEP1        | Telomerase-associated protein 1                                                                           | 4754              | 0.399166          | 0.039799   | No              | 3.62  |
| TERF1       | Telomeric repeat binding factor (NIMA-interacting) 1                                                      | 6870              | 0.263992          | -0.03114   | No              | 1.66  |
| TINF2       | TERF1 (TRF1)-interacting nuclear factor 2                                                                 | 7655              | 0.215658          | -0.05033   | No              | 1.51  |
| PHTF2       | Putative homeodomain transcription factor 2                                                               | 9292              | 0.120357          | -0.11026   | No              | 1.71  |
| CD9         | CD9 molecule                                                                                              | 10010             | 0.081359          | -0.1348    | No              | 1.20  |
| GABRB3      | Gamma-aminobutyric acid (GABA) A receptor, beta 3                                                         | 10181             | 0.072388          | -0.13741   | No              | 1.05  |
| DKK3        | Dickkopf homolog 3 ( <i>Xenopus laevis</i> )                                                              | 10966             | 0.027335          | -0.16796   | No              | 1.03  |
| TTL4        | Tubulin tyrosine ligase-like family, member 4                                                             | 11568             | -0.00746          | -0.19219   | No              | 0.99  |
| LIN28A      | Lin-28 homolog A ( <i>Caenorhabditis elegans</i> )                                                        | 11597             | -0.00943          | -0.19277   | No              | 0.99  |
| ZFP42       | Zinc finger protein 42 homolog (mouse)                                                                    | 11934             | -0.02867          | -0.20484   | No              | 0.97  |
| SOX2        | SRY (sex determining region Y)-box 2                                                                      | 12134             | -0.03865          | -0.21068   | No              | 0.96  |
| DPPA4       | Developmental pluripotency associated 4                                                                   | 13529             | -0.11541          | -0.26097   | No              | 0.83  |
| AKT3        | v-akt murine thymoma viral oncogene homolog 3 (protein kinase B, gamma)                                   | 14513             | -0.16766          | -0.29123   | No              | 0.78  |
| UTF1        | Undifferentiated embryonic cell transcription factor 1                                                    | 14992             | -0.19433          | -0.29914   | No              | 0.70  |
| PRRX1       | Paired related homeobox 1                                                                                 | 15222             | -0.2062           | -0.29612   | No              | 0.73  |
| DPPA2       | Developmental pluripotency associated 2                                                                   | 15309             | -0.21108          | -0.28693   | No              | 0.90  |
| LIN28B      | Lin-28 homolog B ( <i>C. elegans</i> )                                                                    | 15767             | -0.23519          | -0.29152   | No              | 0.64  |
| PHC1        | Polyhomeotic homolog 1 ( <i>Drosophila</i> )                                                              | 16294             | -0.26601          | -0.29708   | No              | 0.67  |
| DNMT3B      | DNA (cytosine-5)-methyltransferase 3 beta                                                                 | 16956             | -0.30607          | -0.30577   | No              | 0.59  |
| GJA1        | Gap junction protein, alpha 1, 43 kDa (connexin 43)                                                       | 17480             | -0.33493          | -0.30706   | No              | 0.47  |
| MYCBP       | c-myc binding protein                                                                                     | 17734             | -0.3485           | -0.29644   | No              | 0.52  |
| RET         | Ret proto-oncogene (multiple endocrine neoplasia and medullary thyroid carcinoma 1, Hirschsprung disease) | 17889             | -0.35774          | -0.2812    | No              | 0.66  |
| SALL2       | Sal-like 2 ( <i>Drosophila</i> )                                                                          | 19606             | -0.4597           | -0.32396   | No              | 0.35  |
| PTWIL2      | Ptvi-like 2 ( <i>Drosophila</i> )                                                                         | 22310             | -0.65571          | -0.39543   | Yes             | 0.43  |
| ELOVL6      | ELOVL family member 6, elongation of long chain fatty acids (FEN1/Elo2, SUR4/Elo3-like, yeast)            | 23128             | -0.78707          | -0.38153   | Yes             | 0.22  |
| KLF5        | Kruppel-like factor 5 (intestinal)                                                                        | 23628             | -0.91083          | -0.34712   | Yes             | 0.45  |
| CXCL5       | Chemokine (C-X-C motif) ligand 5                                                                          | 23776             | -0.96513          | -0.29497   | Yes             | 0.45  |
| NANOG       | Nanog homeobox                                                                                            | 23864             | -1.0092           | -0.23771   | Yes             | 0.27  |
| PROM1       | Prominin 1                                                                                                | 24035             | -1.10322          | -0.17819   | Yes             | 0.58  |
| POU5F1      | POU domain, class 5, transcription factor 1                                                               | 24171             | -1.22526          | -0.10987   | Yes             | 0.31  |
| MYBL2       | v-myb myeloblastosis viral oncogene homolog (avian)-like 2                                                | 24367             | -1.96982          | 0.000863   | Yes             | 0.12  |

KOvsWTforGSEA.KOvsWT.cls#KO\_versus\_WT  
 KOvsWT.cls#KO\_versus\_WT  
 WT  
 CONRAD\_STEM\_CELL  
 -0.43495297  
 -1.6443975  
 0.010869565  
 1.0  
 1.0



SUPPLEMENTARY TABLE S10. GSEA RESULTS SUMMARY OF GENE EXPRESSION IN WNT CANONICAL PATHWAY

| <i>Gene symbol</i> | <i>Gene_title</i>                                                | <i>Rank in gene list</i> | <i>Rank metric score</i> | <i>Running ES</i> | <i>Core enrichment</i> | <i>KO/WT</i> |
|--------------------|------------------------------------------------------------------|--------------------------|--------------------------|-------------------|------------------------|--------------|
| CSNK1G1            | Casein kinase 1, gamma 1                                         | 1558                     | 0.674078226              | 0.009545445       | No                     | 3.10         |
| KLHL12             | Kelch-like 12 (Drosophila)                                       | 2581                     | 0.561615646              | 0.028826853       | No                     | 1.50         |
| DVL3               | Dishevelled, dsh homolog 3 (Drosophila)                          | 9013                     | 0.134897277              | -0.22036928       | No                     | 1.29         |
| CUL3               | Cullin 3                                                         | 9737                     | 0.09571591               | -0.23960444       | No                     | 1.11         |
| DVL2               | Dishevelled, dsh homolog 2 (Drosophila)                          | 12277                    | -0.04648336              | -0.33872718       | No                     | 0.95         |
| RANBP3             | RAN binding protein 3                                            | 13154                    | -0.09388889              | -0.36443996       | No                     | 0.96         |
| AXIN1              | Axin 1                                                           | 15220                    | -0.20587587              | -0.4267369        | No                     | 0.65         |
| PIP5K1B            | Phosphatidylinositol-4-phosphate 5-kinase, type 1, beta          | 15661                    | -0.23007240              | -0.41971317       | No                     |              |
| GSK3A              | Glycogen synthase kinase 3 alpha                                 | 17367                    | -0.32761386              | -0.45396695       | Yes                    | 0.73         |
| WNT3A              | Wingless-type MMTV integration site family, member 3A            | 17743                    | -0.34871229              | -0.43134335       | Yes                    | 0.71         |
| CTNNB1             | Catenin (cadherin-associated protein), beta 1, 88 kDa            | 18939                    | -0.41966083              | -0.43463516       | Yes                    | 0.64         |
| APC                | Adenomatosis polyposis coli                                      | 19290                    | -0.44061285              | -0.40096787       | Yes                    | 0.17         |
| NKD2               | Naked cuticle homolog 2 (Drosophila)                             | 19451                    | -0.45028683              | -0.35844925       | Yes                    | 0.50         |
| GSK3B              | Glycogen synthase kinase 3 beta                                  | 20193                    | -0.49002999              | -0.3354401        | Yes                    | 0.42         |
| LRP6               | Low density lipoprotein receptor-related protein 6               | 21784                    | -0.60416477              | -0.33482885       | Yes                    | 0.28         |
| PPP2R5A            | Protein phosphatase 2, regulatory subunit B (B56), alpha isoform | 22786                    | -0.72745746              | -0.29660782       | Yes                    | 0.54         |
| PI4K2A             | Phosphatidylinositol 4-kinase type 2 alpha                       | 23009                    | -0.76296937              | -0.22254887       | Yes                    | 0.28         |
| FZD5               | Frizzled homolog 5 (Drosophila)                                  | 23382                    | -0.84298586              | -0.14592296       | Yes                    | 0.35         |
| CAV1               | Caveolin 1, caveolae protein, 22 kDa                             | 23393                    | -0.84527677              | -0.05419238       | Yes                    | 0.43         |
| DVL1               | Dishevelled, dsh homolog 1 (Drosophila)                          | 23490                    | -0.87133818              | 0.03684999        | Yes                    | 0.39         |

Dataset KOvsWTforGSEA.KOvsWT.cls#KO\_versus\_WT  
 Phenotype KOvsWT.cls#KO\_versus\_WT  
 Upregulated in class WT  
 GeneSet PID\_WNT\_CANONICAL\_PATHWAY  
 ES -0.4896791  
 NES -1.5536127  
 Nominal P-value 0.043165468  
 FDR q-value 1.0  
 FWER P-value 1.0



SUPPLEMENTARY TABLE S11. GSEA RESULTS SUMMARY OF GENE EXPRESSION IN BETA CATENIN DEGRADATION PATHWAY

| Dataset              |                                                       | KOvsWTforGSEA.KOvsWT.cls#KO_versus_WT |                          |                   |                        |              |
|----------------------|-------------------------------------------------------|---------------------------------------|--------------------------|-------------------|------------------------|--------------|
| Phenotype            |                                                       | KOvsWT.cls#KO_versus_WT               |                          |                   |                        |              |
| Upregulated in class |                                                       | WT                                    |                          |                   |                        |              |
| GeneSet              |                                                       | PID_BETACATENIN_DEG_PATHWAY           |                          |                   |                        |              |
| ES                   |                                                       | -0.51706684                           |                          |                   |                        |              |
| NES                  |                                                       | -1.5547533                            |                          |                   |                        |              |
| Nominal P-value      |                                                       | 0.038043477                           |                          |                   |                        |              |
| FDR q-value          |                                                       | 1.0                                   |                          |                   |                        |              |
| FWER P-value         |                                                       | 1.0                                   |                          |                   |                        |              |
| <i>Gene symbol</i>   | <i>Gene_title</i>                                     | <i>Rank in gene list</i>              | <i>Rank metric score</i> | <i>Running ES</i> | <i>Core enrichment</i> | <i>KO/WT</i> |
| CUL1                 | Cullin 1                                              | 1237                                  | 0.730244                 | 0.050141          | No                     | 3.53         |
| DVL3                 | Dishevelled, dsh homolog 3 (Drosophila)               | 9013                                  | 0.134897                 | -0.25023          | No                     | 1.29         |
| DVL2                 | Dishevelled, dsh homolog 2 (Drosophila)               | 12277                                 | -0.04648                 | -0.37769          | No                     | 0.95         |
| CSNK1E               | Casein kinase 1, epsilon                              | 14035                                 | -0.14249                 | -0.4301           | No                     | 0.79         |
| CSNK1A1              | Casein kinase 1, alpha 1                              | 14230                                 | -0.15327                 | -0.41688          | No                     | 0.91         |
| AXIN1                | Axin 1                                                | 15220                                 | -0.20588                 | -0.42901          | No                     | 0.65         |
| GSK3A                | Glycogen synthase kinase 3 alpha                      | 17367                                 | -0.32761                 | -0.4718           | Yes                    | 0.66         |
| WNT3A                | Wingless-type MMTV integration site family, member 3A | 17743                                 | -0.34871                 | -0.43901          | Yes                    | 0.71         |
| CSNK1D               | Casein kinase 1, delta                                | 18713                                 | -0.40611                 | -0.42265          | Yes                    | 0.71         |
| CTNNB1               | Catenin (cadherin-associated protein), beta 1, 88 kDa | 18939                                 | -0.41966                 | -0.3739           | Yes                    | 0.64         |
| APC                  | Adenomatosis polyposis coli                           | 19290                                 | -0.44061                 | -0.32739          | Yes                    | 0.17         |
| AXIN2                | Axin 2 (conductin, axil)                              | 19983                                 | -0.47968                 | -0.2895           | Yes                    | 0.39         |
| GSK3B                | Glycogen synthase kinase 3 beta                       | 20193                                 | -0.49003                 | -0.23037          | Yes                    | 0.42         |
| SSPO                 | SCO-spondin homolog (Bos taurus)                      | 21664                                 | -0.59341                 | -0.2087           | Yes                    | 0.36         |
| LRP6                 | Low density lipoprotein receptor-related protein 6    | 21784                                 | -0.60416                 | -0.1301           | Yes                    | 0.28         |
| FZD5                 | Frizzled homolog 5 (Drosophila)                       | 23382                                 | -0.84299                 | -0.07915          | Yes                    | 0.35         |
| DVL1                 | Dishevelled, dsh homolog 1 (Drosophila)               | 23490                                 | -0.87134                 | 0.036846          | Yes                    | 0.39         |
